# Supplementary material for: Ultra-low level detection of hepatocellular carcinoma global methylation using a AuNP modified carbon fiber microelectrode
Source: Royal Society of Chemistry journal article supplement (doi:10.1039/d0ra00905a), 2020-01-01
Supplement: d0ra00905a1.pdf [file d0ra00905a1.pdf]

Supporting Information (SI)

*for*

**An ultra-low level detection of hepatocellular carcinoma global  
methylation using AuNPs modified carbon fiber microelectrode**

*Bobo Huang*<sup>as</sup>, *Bin Zhang*<sup>bs</sup>, *Bo Liang*<sup>a\*</sup>, *Lu Fang*<sup>c</sup>, *Xuesong Ye*<sup>a\*</sup>

Table.S1: Sequences of DNA oligonucleotides and primes.

| Oligos                     | 5'-3'                                                             |
|----------------------------|-------------------------------------------------------------------|
| Methylated Sequence        | AATACCTCGCCTACTTCGACTCGTACACGATAC<br>G<br>CGCACCCACTAACCTACGCCAC  |
| 4 site Methylated Sequence | AATACCTCACCTACTTCGACTCATACACGATACG<br>CGCACCCACTAACCTACACCCAC     |
| 1 site Methylated Sequence | AATACCTCACCTACTTCAACTCATACACGATAC<br>A<br>CACACCCACTAACCTACACCCAC |
| Unmethylated Sequence      | AATACCTCACCTACTTCAACTCATACACAATAC<br>A<br>CACACCCACTAACCTACACCCAC |
| LINE-1-M forward           | GTAAGGGGTTAGGGAGTTTTTTTT                                          |
| LINE-1-M reward            | TCTCAAACACTATACTAACAATCAAC                                        |
| LINE-1-U forward           | GCAAGGGGTCAGGGAGTTCCTTT                                           |
| LINE-1-U reward            | TCAAAC TGCAAGGCCGAGCAAGGCTG                                       |
| 201bp LINE-1- F            | AGGCATTGTCTCACTTGGA                                               |
| 201bp LINE-1- R            | CCACGGAGTCTCGCTGATT                                               |

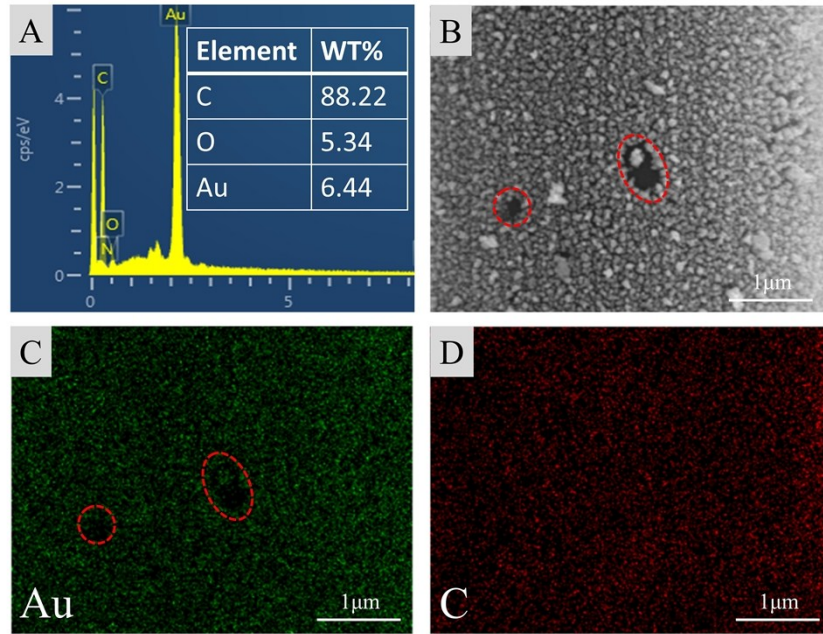

Fig.S1 The elemental distribution of AuNPs-CFME. (A) The EDS spectrum. The inset: the weight ratio of elements. (B) The SEM image. (C) The elemental mapping image of Au. (D) The elemental mapping image of C.

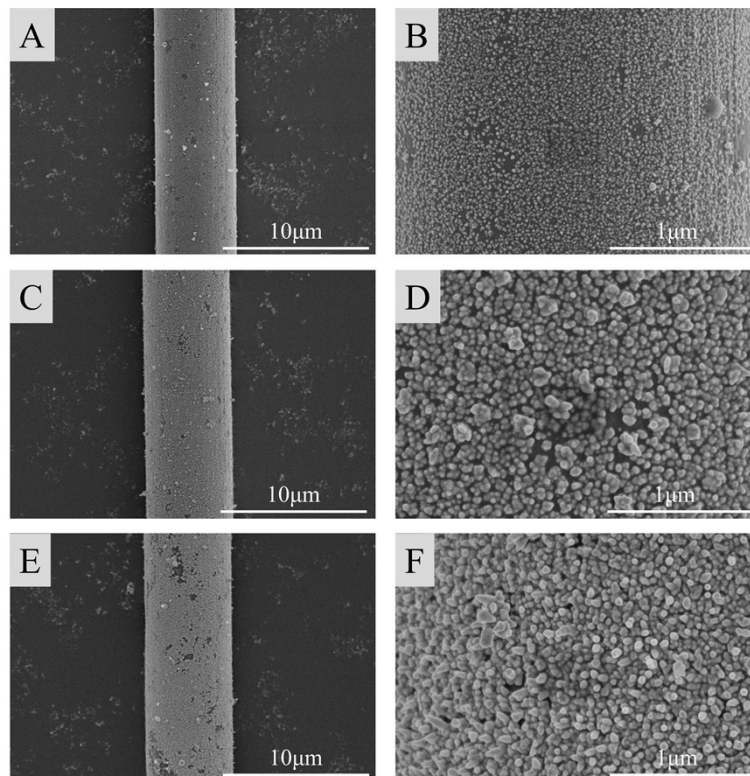

Fig.S2 The SEM images of AuNPs-CFME. (A) (B) 25 s electrodeposition. (C) (D) 100 s electrodeposition. (E) (F) 200 s electrodeposition.
